# Supplementary material for: Hybrid MoSe2–indocyanine green nanosheets as a highly efficient phototheranostic agent for photoacoustic imaging guided photothermal cancer therapy
Source: Royal Society of Chemistry journal article supplement (doi:10.1039/c8bm00104a), 2018-01-01
Supplement: c8bm00104a1.pdf [file c8bm00104a1.pdf]

**Supplementary information**

**Hybrid MoSe<sub>2</sub>-indocyanine green nanosheets as a high-efficient phototheranostic agent for photoacoustic imaging guided photothermal cancer therapy**

Jingqin Chen,<sup>ab</sup> Xueshen Li,<sup>a</sup> Xiaoyang Liu,<sup>a</sup> Huixiang Yan,<sup>a</sup> Zhihua Xie,<sup>a</sup> Zonghai Sheng,<sup>c</sup> Xiaojing Gong,<sup>a</sup> Lidai Wang,<sup>d</sup> Xin Liu,<sup>c</sup> Peng Zhang,<sup>e</sup> Hairong Zheng,<sup>c</sup> Liang Song,<sup>a</sup> and Chengbo Liu,<sup>\*a</sup>

*<sup>a</sup> Research Laboratory for Biomedical Optics and Molecular Imaging, Shenzhen Key Laboratory for Molecular Imaging, Institute of Biomedical and Health Engineering, Shenzhen Institutes of Advanced Technology, Chinese Academy of Sciences, Shenzhen 518055, China.*

*<sup>b</sup> Shenzhen College of Advanced Technology, University of Chinese Academy of Sciences, Shenzhen 518055, China.*

*<sup>c</sup> Paul C. Lauterbur Research Center for Biomedical Imaging, Institute of Biomedical and Health Engineering, Shenzhen Institutes of Advanced Technology, Chinese Academy of Sciences, Shenzhen 518055, China.*

*<sup>d</sup> Prof. L. Wang*

*Department of Mechanical and Biomedical Engineering, City University of Hong Kong, 83 Tat Chee Ave, Kowloon, Hong Kong SAR, China.*

*e* Translational Medicine R&D Center, Institute of Biomedical and Health Engineering, Shenzhen Institutes of Advanced Technology, Chinese Academy of Sciences, Shenzhen 518055, China.

\* Corresponding author: C Liu

E-mail: cb.liu@siat.ac.cn. Tel.: +86 (755) 8639-2240

**Figure S1**

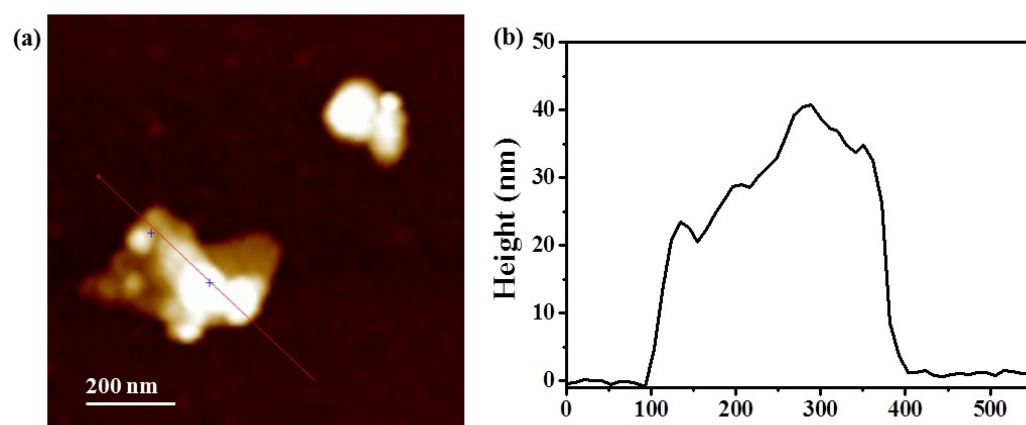

**Figure S1** The AFM image and height of bulk MoSe<sub>2</sub>.

**Figure S2**

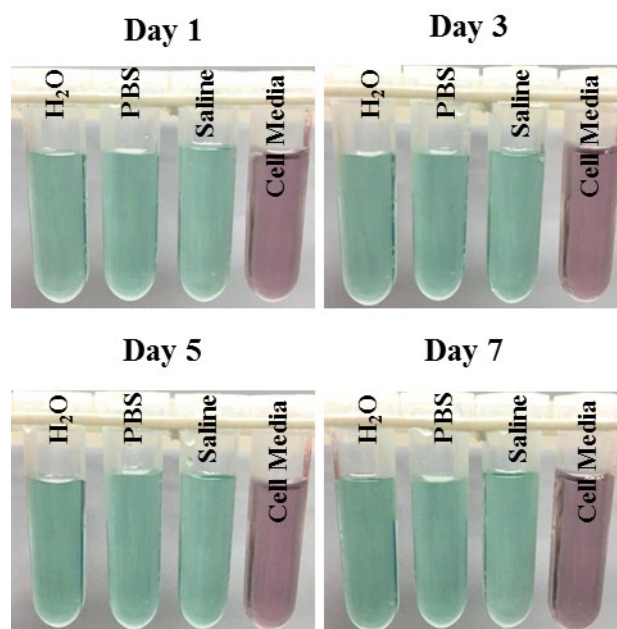

**Figure S2** The images of sMoSe<sub>2</sub>-ICG NSs in water, PBS, saline and cell media at day 1, day 3, day 5 and day 7, respectively.

**Figure S3**

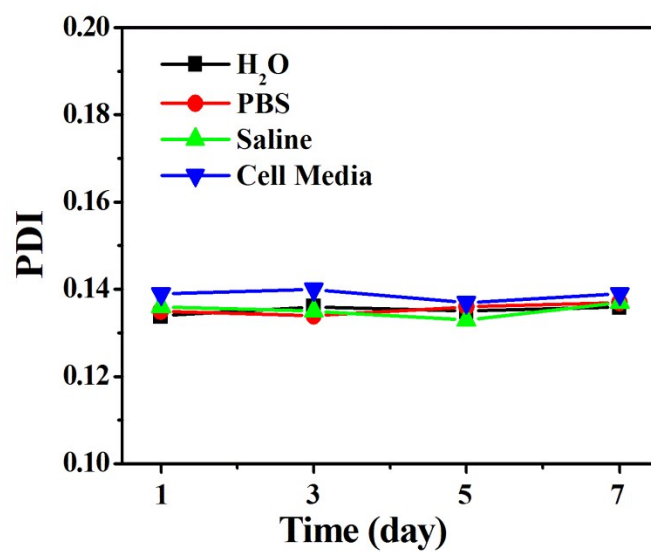

**Figure S3** The polydispersity index (PDI) of sMoSe<sub>2</sub>-ICG NSs in water, PBS, saline and cell media at day 1, day 3, day 5 and day 7, respectively.

**Figure S4**

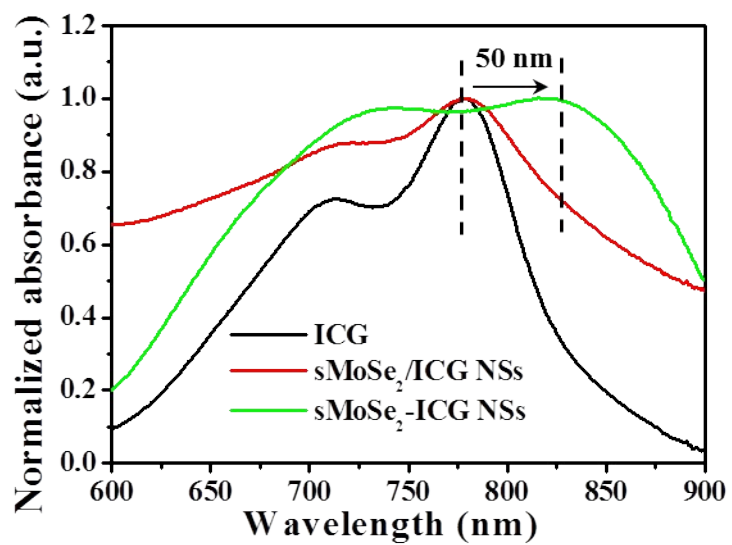

**Figure S4** The normalized absorbance spectra of ICG, sMoSe<sub>2</sub>/ICG NSs and sMoSe<sub>2</sub>-ICG NSs.

**Figure S5**

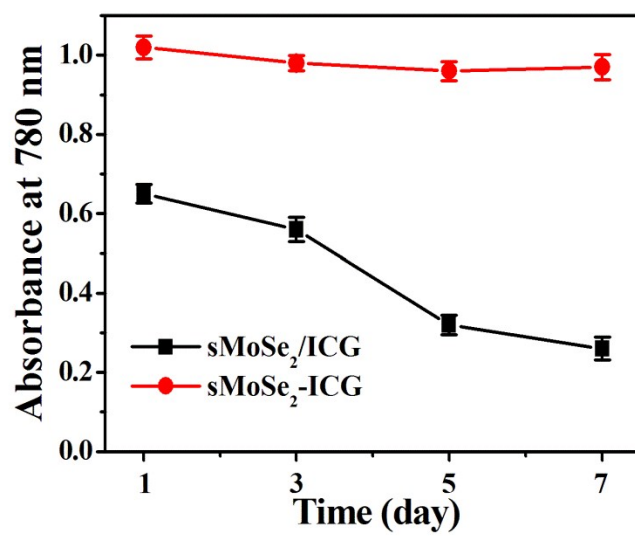

**Figure S5** The absorbance of sMoSe<sub>2</sub>/ICG NSs and sMoSe<sub>2</sub>-ICG NSs in dialyzate at day 1, day 3, day 5 and day 7, respectively.

**Figure S6**

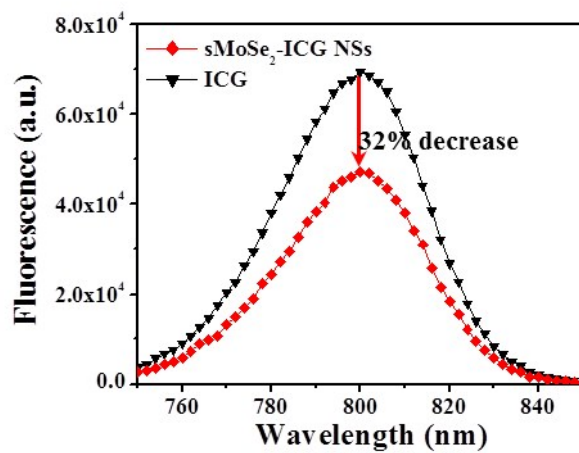

**Figure S6** The fluorescence spectra of free ICG and sMoSe<sub>2</sub>-ICG NSs.

**Figure S7**

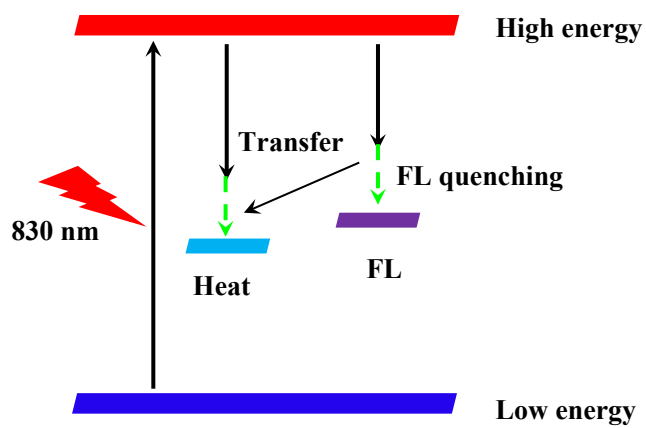

**Figure S7** The scheme of energy assignment of sMoSe<sub>2</sub>-ICG NSs under 830 nm laser irradiation. FL: fluorescence.



**Figure S8**

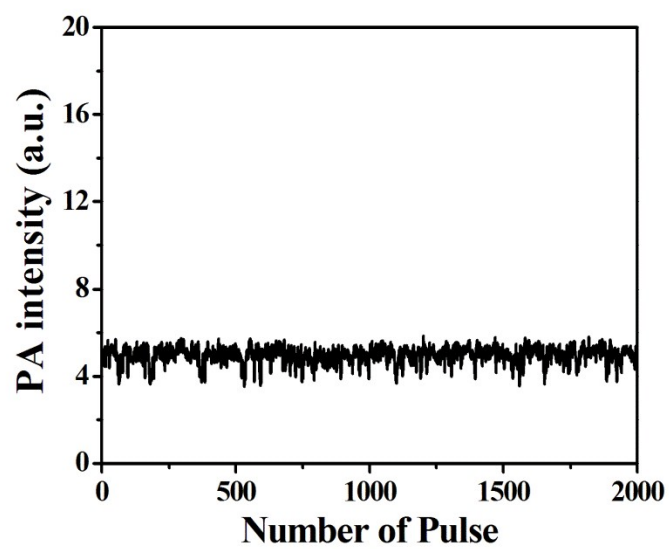

**Figure S8** The photostability of sMoSe<sub>2</sub>-ICG NSs. There was no obvious PA signal attenuation after exposure to 2000 laser pulses (6 mJ/cm<sup>2</sup>). PA: photoacoustic.

**Figure S9**

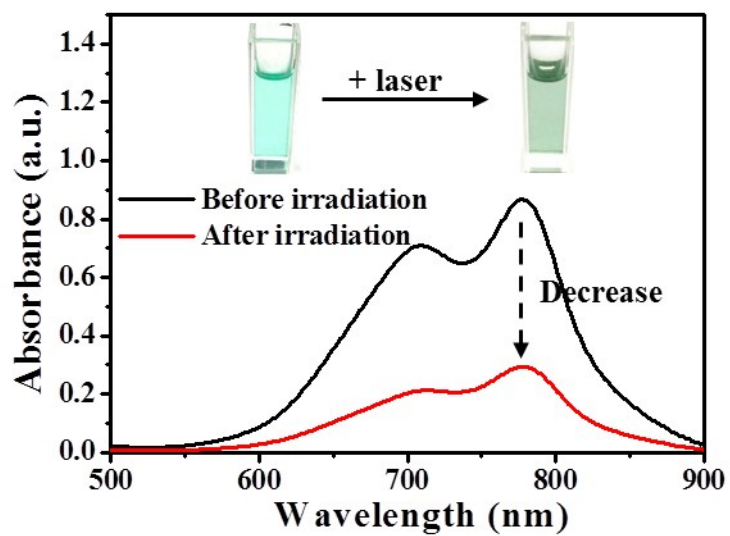

**Figure S9** Absorption spectra of free indocyanine green (ICG) solutions before and after 808 nm laser irradiation at a power density of 0.5 W/cm<sup>2</sup> for 5 min; insets are photographs of the ICG solutions before (left) and after (right) laser irradiation.

**Figure S10**

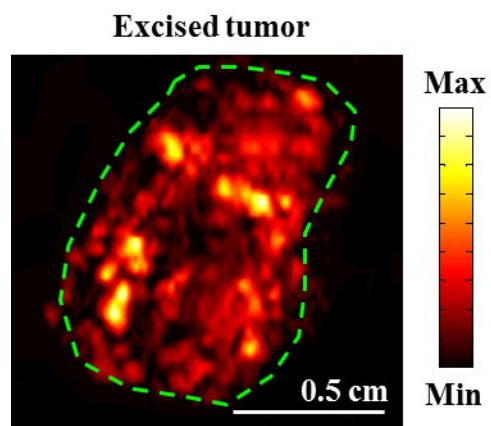

**Figure S10** The PA MAP image of excised tumor at 24 h post-injection of sMoSe<sub>2</sub>-ICG NSs. PA: photoacoustic; MAP: maximum amplitude projection.

**Figure S11**

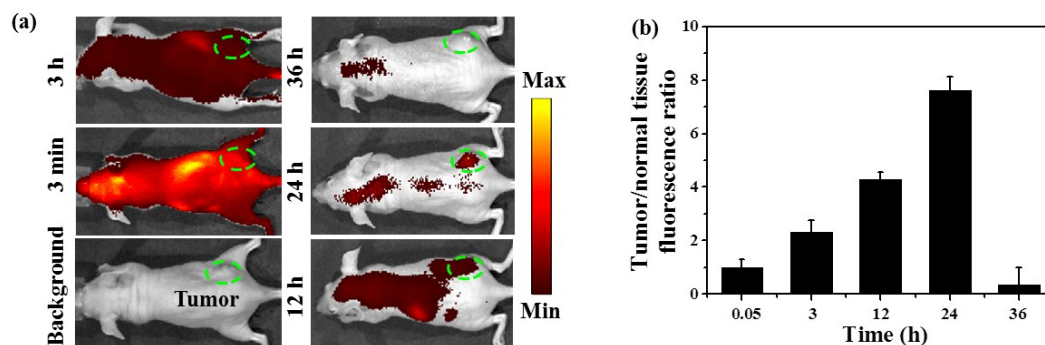

**Figure S11** (a) Fluorescence images of tumor bearing mice at 3 min, 3h, 12h, 24h, 36h post intravenous injection of sMoSe<sub>2</sub>-ICG NSs. (b) Statistical results of fluorescence signals in the tumor region over time. PA: photoacoustic, US: ultrasound.

**Figure S12**

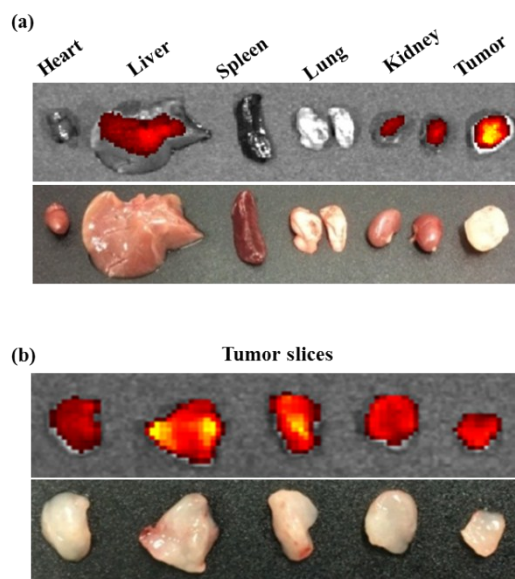

**Figure S12** Fluorescence images of (a) major organs and (b) tumor slices from sMoSe<sub>2</sub>-ICG NSs injected tumor bearing mice at 24 h point.
